# Supplementary material
Source: Springer Nature journal article supplement (https://www.springermedizin.de/resource/supplementary/12871_2014_293_MOESM1_ESM.pdf/9429274)
Supplement: MOESM1 [file 9429274]

n=76

Patients developing CA in the hospital and acquiring ROSC with successful CPR between 17.09.2012 and 20.09.2013 in ICU treatment

n=44

TH

n=32

no TH

n=4

Mortality during TH

n=7

Mortality after TH

n=30

**Good neurological outcome  
(GCS>10)**

n=33

Discharge from ICU

n=3

Bad neurological outcome  
(GCS  $\uparrow$  10)
